# Supplementary material for: Mortality and Morbidity in Kidney Transplant Recipients With a Failing Graft: A Matched Cohort Study
Source: PubMed Central journal article supplement — Can J Kidney Health Dis. 2020 Apr 14;7:2054358120908677. doi: 10.1177/2054358120908677 (PMC7158256; doi:10.1177/2054358120908677), 2020-04-14
Supplement: RTx_Failing_-_Appendix_-_20190528.pdf [file RTx_Failing_-_Appendix_-_20190528.pdf]

## **Supplementary Material**

**Figure S1.** Kidney transplant recipient cohort creation.

**Figure S2.** Chronic kidney disease cohort creation.

**Table S1.** STROBE checklist.

**Table S2.** Databases and coding definitions for inclusion/exclusion criteria, baseline characteristics, and outcome measurements.

**Table S3.** Baseline characteristics of kidney transplant recipients with a failing graft and non-transplant patients with chronic kidney disease at the time of cohort entry prior to matching.

**Figure S1.** Kidney transplant recipient cohort creation.

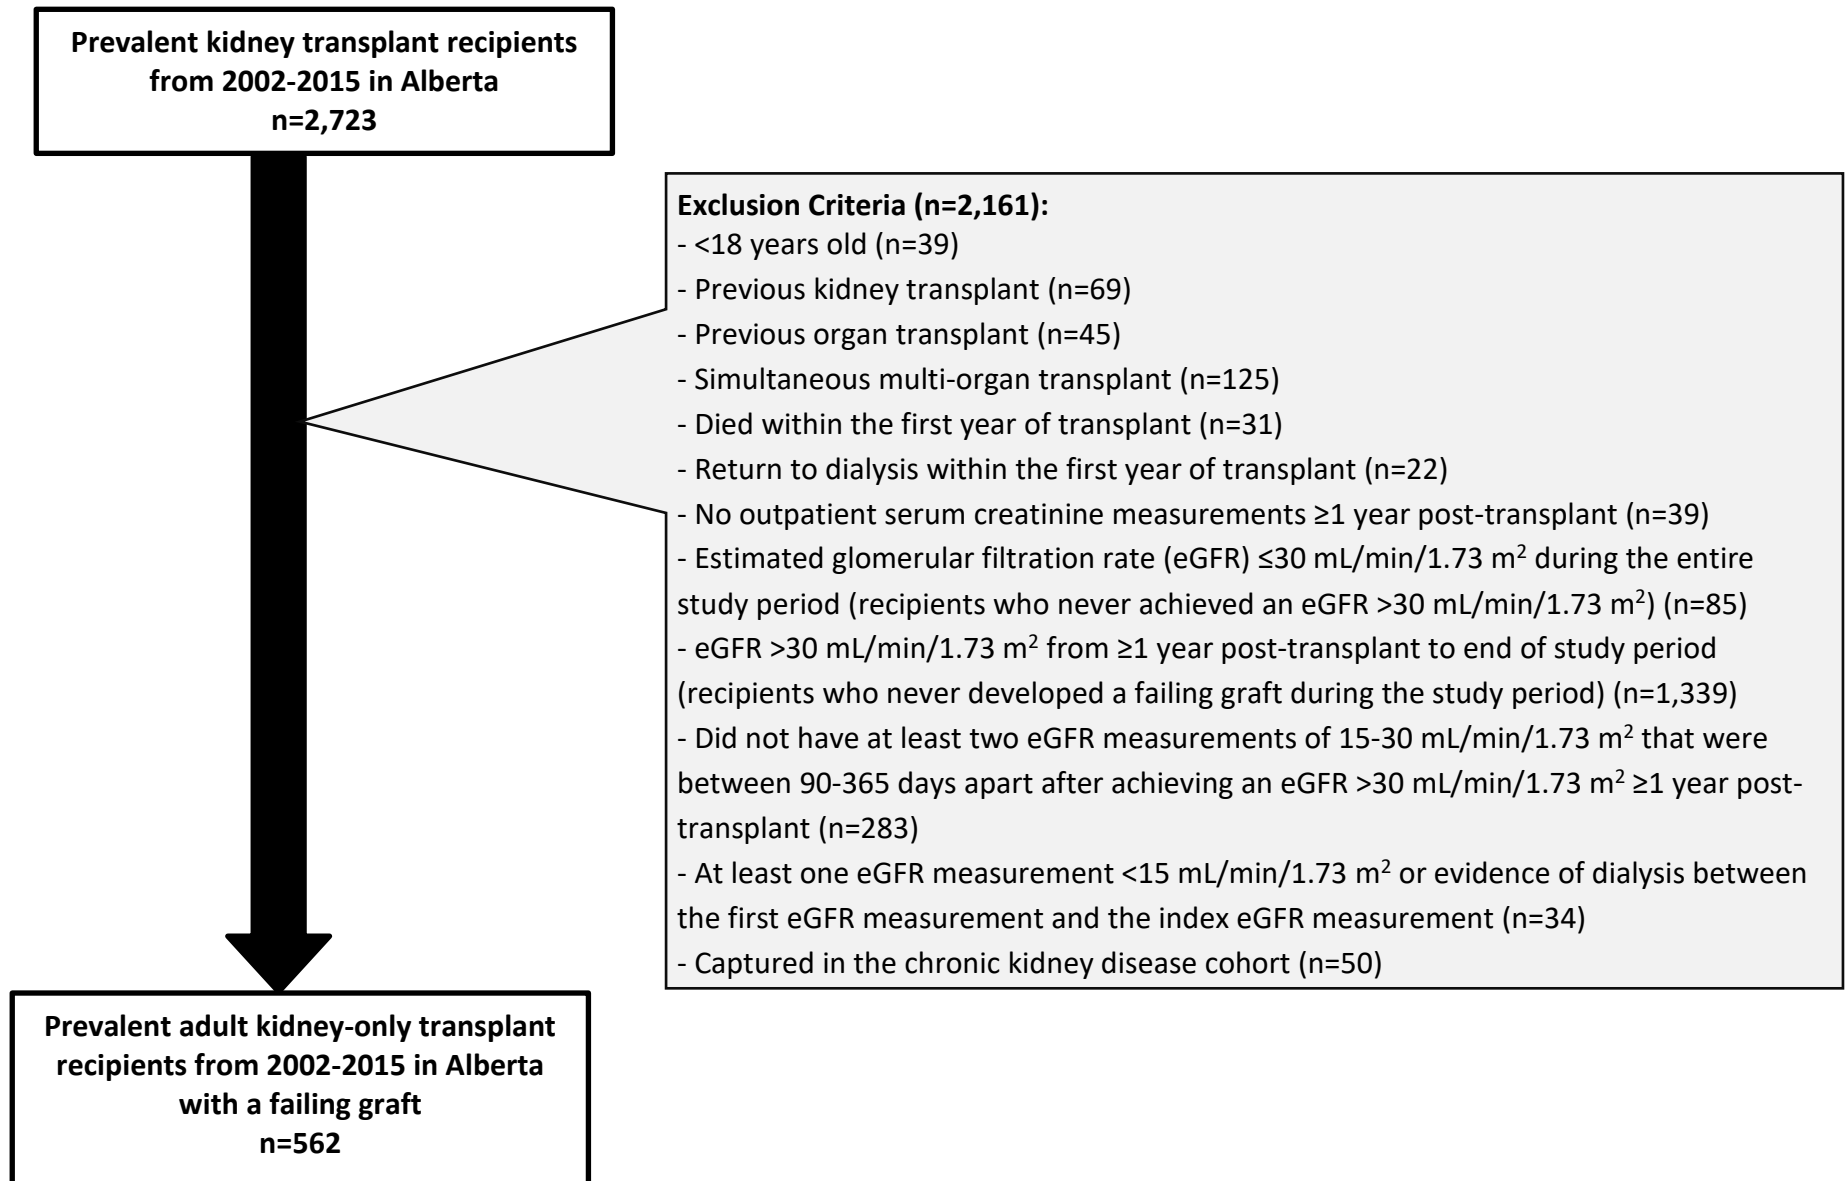

**Figure S2.** Chronic kidney disease cohort creation.

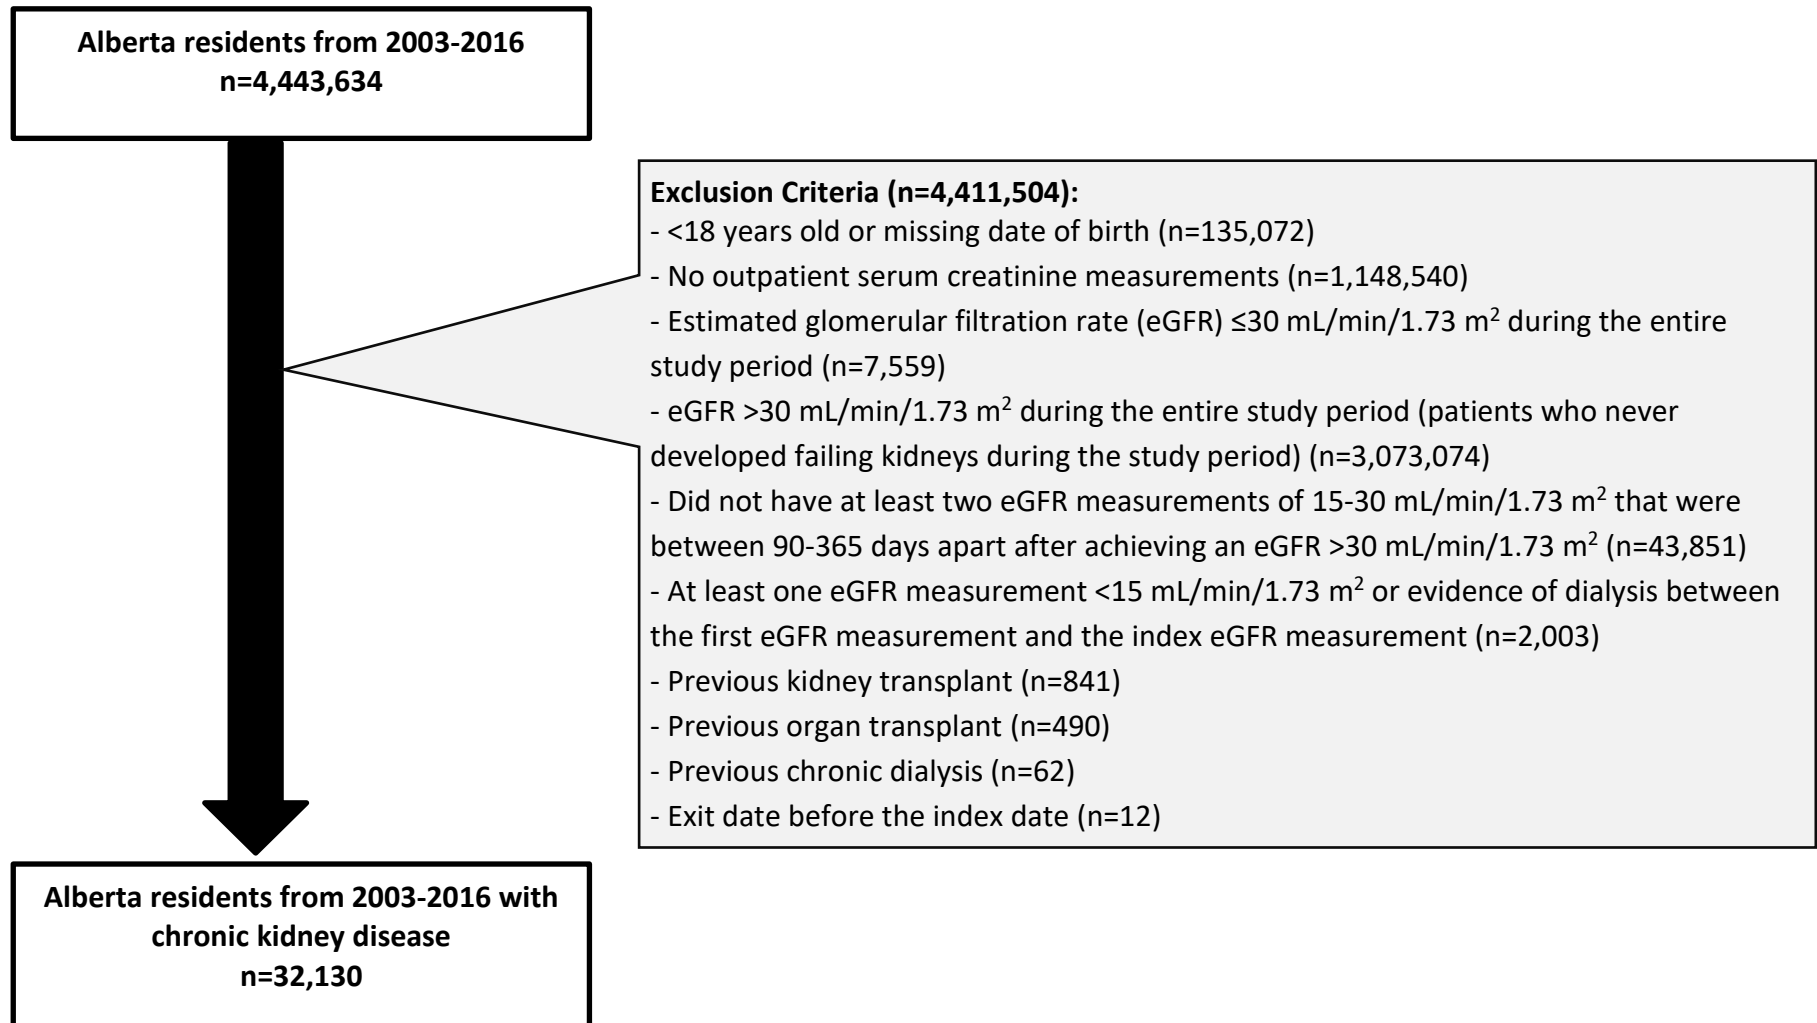

| <b>Table S1. STROBE checklist.</b> <sup>44</sup> |             |                                                                                                                                                                                      |                          |
|--------------------------------------------------|-------------|--------------------------------------------------------------------------------------------------------------------------------------------------------------------------------------|--------------------------|
|                                                  | <b>Item</b> | <b>Recommendation</b>                                                                                                                                                                | <b>Section</b>           |
| Title and abstract                               | 1           | (a) Indicate the study's design with a commonly used term in the title or the abstract                                                                                               | Title                    |
|                                                  |             | (b) Provide in the abstract an informative and balanced summary of what was done and what was found                                                                                  | Abstract                 |
| <b>Introduction</b>                              |             |                                                                                                                                                                                      |                          |
| Background/rationale                             | 2           | Explain the scientific background and rationale for the investigation being reported                                                                                                 | Introduction             |
| Objectives                                       | 3           | State specific objectives, including any prespecified hypotheses                                                                                                                     | Introduction             |
| <b>Methods</b>                                   |             |                                                                                                                                                                                      |                          |
| Study design                                     | 4           | Present key elements of study design early in the paper                                                                                                                              | Methods                  |
| Setting                                          | 5           | Describe the setting, locations, and relevant dates, including periods of recruitment, exposure, follow-up, and data collection                                                      | Methods<br>Figure 1      |
| Participants                                     | 6           | (a) Give the eligibility criteria, and the sources and methods of selection of participants. Describe methods of follow-up                                                           | Methods<br>Figure S1, S2 |
|                                                  |             | (b) For matched studies, give matching criteria and number of exposed and unexposed                                                                                                  | Methods                  |
| Variables                                        | 7           | Clearly define all outcomes, exposures, predictors, potential confounders, and effect modifiers. Give diagnostic criteria, if applicable                                             | Methods<br>Table S2      |
| Data sources/<br>measurement                     | 8           | For each variable of interest, give sources of data and details of methods of assessment (measurement). Describe comparability of assessment methods if there is more than one group | Methods<br>Table S2      |
| Bias                                             | 9           | Describe any efforts to address potential sources of bias                                                                                                                            | Methods                  |
| Study size                                       | 10          | Explain how the study size was arrived at                                                                                                                                            | Methods                  |
| Quantitative variables                           | 11          | Explain how quantitative variables were handled in the analyses. If applicable, describe which groupings were chosen and why                                                         | Methods                  |
| Statistical methods                              | 12          | (a) Describe all statistical methods, including those used to control for confounding                                                                                                | Methods                  |
|                                                  |             | (b) Describe any methods used to examine subgroups and interactions                                                                                                                  | Methods                  |
|                                                  |             | (c) Explain how missing data were addressed                                                                                                                                          | Methods                  |
|                                                  |             | (d) If applicable, explain how loss to follow-up was addressed                                                                                                                       | Methods                  |
|                                                  |             | (e) Describe any sensitivity analyses                                                                                                                                                | Not Applicable           |

| <b>Table S1. STROBE checklist (continued).</b> |             |                                                                                                                                                                                                               |                          |
|------------------------------------------------|-------------|---------------------------------------------------------------------------------------------------------------------------------------------------------------------------------------------------------------|--------------------------|
|                                                | <b>Item</b> | <b>Recommendation</b>                                                                                                                                                                                         | <b>Section</b>           |
| <b>Results</b>                                 |             |                                                                                                                                                                                                               |                          |
| Participants                                   | 13          | (a) Report numbers of individuals at each stage of study—e.g. numbers potentially eligible, examined for eligibility, confirmed eligible, included in the study, completing follow-up, and analysed           | Results<br>Figure S1, S2 |
|                                                |             | (b) Give reasons for non-participation at each stage                                                                                                                                                          | Results                  |
|                                                |             | (c) Consider use of a flow diagram                                                                                                                                                                            | Figure S1, S2            |
| Descriptive data                               | 14          | (a) Give characteristics of study participants (e.g. demographic, clinical, social) and information on exposures and potential confounders                                                                    | Results<br>Table 1, S3   |
|                                                |             | (b) Indicate number of participants with missing data for each variable of interest                                                                                                                           | Methods<br>Table S3      |
|                                                |             | (c) Summarise follow-up time (e.g. average and total amount)                                                                                                                                                  | Results                  |
| Outcome data                                   | 15          | Report numbers of outcome events or summary measures over time                                                                                                                                                | Results<br>Table 2       |
| Main results                                   | 16          | (a) Give unadjusted estimates and, if applicable, confounder-adjusted estimates and their precision (e.g. 95% confidence interval). Make clear which confounders were adjusted for and why they were included | Results                  |
|                                                |             | (b) Report category boundaries when continuous variables were categorized                                                                                                                                     | Results                  |
|                                                |             | (c) If relevant, consider translating estimates of relative risk into absolute risk for a meaningful time period                                                                                              | Results                  |
| Other analyses                                 | 17          | Report other analyses done—e.g. analyses of subgroups and interactions, and sensitivity analyses                                                                                                              | Not applicable           |
| <b>Discussion</b>                              |             |                                                                                                                                                                                                               |                          |
| Key results                                    | 18          | Summarise key results with reference to study objectives                                                                                                                                                      | Discussion               |
| Limitations                                    | 19          | Discuss limitations of the study, taking into account sources of potential bias or imprecision. Discuss both direction and magnitude of any potential bias                                                    | Discussion               |
| Interpretation                                 | 20          | Give a cautious overall interpretation of results considering objectives, limitations, multiplicity of analyses, results from similar studies, and other relevant evidence                                    | Discussion               |
| Generalisability                               | 21          | Discuss the generalisability (external validity) of the study results                                                                                                                                         | Discussion               |
| <b>Other information</b>                       |             |                                                                                                                                                                                                               |                          |
| Funding                                        | 22          | Give the source of funding and the role of the funders for the present study and, if applicable, for the original study on which the present article is based                                                 | Funding                  |

| <b>Table S2. Databases and coding definitions for inclusion/exclusion criteria, baseline characteristics, and outcome measurements.</b> |                         |                                                                                                       |                                                                                              |
|-----------------------------------------------------------------------------------------------------------------------------------------|-------------------------|-------------------------------------------------------------------------------------------------------|----------------------------------------------------------------------------------------------|
| <b>Variable</b>                                                                                                                         | <b>Database</b>         | <b>Codes</b>                                                                                          |                                                                                              |
| <b>Inclusion Criteria</b>                                                                                                               |                         |                                                                                                       |                                                                                              |
| Kidney transplantation                                                                                                                  | NARP, SARP              | Variables: Modality = Transplant, Incident = 1, Numintrans = 1, Transdate1 = Date of first transplant |                                                                                              |
| Laboratory investigation                                                                                                                | AKDN                    | Serum creatinine                                                                                      |                                                                                              |
| <b>Exclusion Criteria</b>                                                                                                               |                         |                                                                                                       |                                                                                              |
| Age                                                                                                                                     | AH                      | Population Registry                                                                                   |                                                                                              |
| Kidney transplantation (prior to May 2002)                                                                                              | NARP, SARP (since 2001) | Variable: Trans2001                                                                                   |                                                                                              |
|                                                                                                                                         | AH (since 1994)         | CCI code: 1PC85<br>ICD-9-CM: 5569<br>CCP codes: 67.4, 67.59, 67.5                                     |                                                                                              |
| Other organ transplant                                                                                                                  | AH                      | Pancreas transplant                                                                                   | CCI: 10J85<br>ICD-9-CM: 528 (includes 5280, 5281, 5282, 5283, 5284, 5285, 5286)<br>CCP: 64.8 |
|                                                                                                                                         |                         | Liver transplant                                                                                      | CCI: 10A85<br>ICD-9-CM: 505 (includes 5051, 5059)<br>CCP: 62.49, 62.4                        |
|                                                                                                                                         |                         | Bowel transplant                                                                                      | CCI: 1NK85, 1NP85<br>ICD-9-CM: 4697<br>CCP: 58.99                                            |
|                                                                                                                                         |                         | Multi-visceral transplant                                                                             | CCI: 1HY85, 1OK85<br>ICD-9-CM: 336<br>CCP: 45.6                                              |
|                                                                                                                                         |                         | Lung transplant                                                                                       | CCI: 1GR85, 1GT85<br>ICD-9-CM: 335 (includes 3350, 3351, 3352)<br>CCP: 45.5                  |
|                                                                                                                                         |                         | Heart transplant                                                                                      | CCI: 1HZ85<br>ICD-9-CM: 3751<br>CCP: 49.5                                                    |
| Mortality                                                                                                                               | AH                      | Alberta Vital Statistics                                                                              |                                                                                              |
| Dialysis                                                                                                                                | NARP, SARP              | Variable: Dialinit & Prevmod = Transplant: Date of dialysis initiation <1 year after transplant date  |                                                                                              |
| Laboratory investigation                                                                                                                | AKDN                    | Serum creatinine                                                                                      |                                                                                              |

| <b>Table S2.</b> Databases and coding definitions for inclusion/exclusion criteria, baseline characteristics, and outcome measurements (continued). |                 |                                                                                                                                                                                                                                                                                                                                                                                                                                                                                                                                                                                                                                                                                                                                                                                                              |                                                      |
|-----------------------------------------------------------------------------------------------------------------------------------------------------|-----------------|--------------------------------------------------------------------------------------------------------------------------------------------------------------------------------------------------------------------------------------------------------------------------------------------------------------------------------------------------------------------------------------------------------------------------------------------------------------------------------------------------------------------------------------------------------------------------------------------------------------------------------------------------------------------------------------------------------------------------------------------------------------------------------------------------------------|------------------------------------------------------|
| <b>Variable</b>                                                                                                                                     | <b>Database</b> | <b>Codes</b>                                                                                                                                                                                                                                                                                                                                                                                                                                                                                                                                                                                                                                                                                                                                                                                                 |                                                      |
| <b>Baseline Characteristics - Demographics</b>                                                                                                      |                 |                                                                                                                                                                                                                                                                                                                                                                                                                                                                                                                                                                                                                                                                                                                                                                                                              |                                                      |
| Age, Sex, SES, Urban                                                                                                                                | AH              | Population Registry                                                                                                                                                                                                                                                                                                                                                                                                                                                                                                                                                                                                                                                                                                                                                                                          |                                                      |
| <b>Baseline Characteristics – Kidney-related Characteristics</b>                                                                                    |                 |                                                                                                                                                                                                                                                                                                                                                                                                                                                                                                                                                                                                                                                                                                                                                                                                              |                                                      |
| Distance to transplant center                                                                                                                       | AH              | The Manhattan distance between the postal code of the participant’s residence and the postal code of the nearest transplant facility was estimated using the Haversine formula                                                                                                                                                                                                                                                                                                                                                                                                                                                                                                                                                                                                                               |                                                      |
| Site/Year of transplantation                                                                                                                        | NARP, SARP      | Variable: Program                                                                                                                                                                                                                                                                                                                                                                                                                                                                                                                                                                                                                                                                                                                                                                                            |                                                      |
| Laboratory investigation                                                                                                                            | AKDN            | Serum creatinine                                                                                                                                                                                                                                                                                                                                                                                                                                                                                                                                                                                                                                                                                                                                                                                             |                                                      |
|                                                                                                                                                     |                 | Albuminuria: Defined by ACR, PCR, or urine dipstick based on outpatient random spot urine measurements. Measurements were categorized as none/mild (A1: dipstick negative/trace, PCR <15 mg/mmol, ACR <30 mg/g), moderate (A2: dipstick 1+, PCR 15-50 mg/mmol, ACR 30-300 mg/g), or severe/nephrotic (A3/A4: dipstick 2+ to 4+, PCR >51mg/mmol, ACR >301 mg/g). <sup>10,30–32</sup> ACR was the primary measure of albuminuria, and if unavailable, was supplemented with PCR. When both ACR and PCR were unavailable, urine dipstick was used. All outpatient ACR or PCR measurements or urine dipsticks in the 90-days before the index eGFR were used to establish baseline albuminuria. For those with multiple albuminuria measurements, we used the median value rounded down to the nearest category. |                                                      |
| <b>Baseline Co-morbidities</b>                                                                                                                      |                 |                                                                                                                                                                                                                                                                                                                                                                                                                                                                                                                                                                                                                                                                                                                                                                                                              |                                                      |
| <b>Variable</b>                                                                                                                                     | <b>Database</b> | <b>Codes</b>                                                                                                                                                                                                                                                                                                                                                                                                                                                                                                                                                                                                                                                                                                                                                                                                 | <b>Validation</b>                                    |
| Hypertension <sup>20,45</sup>                                                                                                                       | AH              | 1 hospitalization or 2 claims in 2 years or less:<br>ICD-9-CM: 401-405<br>ICD-10: I10-I13, I15                                                                                                                                                                                                                                                                                                                                                                                                                                                                                                                                                                                                                                                                                                               | ICD-9-CM: Sn 79%, PPV 95%<br>ICD-10: Sn 68%, PPV 93% |
| Diabetes mellitus <sup>19</sup>                                                                                                                     | AH              | 1 hospitalization or 2 claims in 2 years or less:<br>ICD-9-CM: 250<br>ICD-10: E10-E14                                                                                                                                                                                                                                                                                                                                                                                                                                                                                                                                                                                                                                                                                                                        | ICD-9-CM: Sn 86%, PPV 80%                            |
| Myocardial infarction <sup>46</sup>                                                                                                                 | AH              | 1 hospitalization:<br>ICD-9-CM: 410<br>ICD-10: I21, I22                                                                                                                                                                                                                                                                                                                                                                                                                                                                                                                                                                                                                                                                                                                                                      | ICD-9-CM: Sn 89%, PPV 89%                            |
| Percutaneous coronary intervention <sup>47</sup>                                                                                                    | AH              | CCI: 1IJ50, 1IJ54GQAZ, 1IJ57GQ, 1I135<br>CCP: 51.59C, 51.59D, 51.59E, 51.59F                                                                                                                                                                                                                                                                                                                                                                                                                                                                                                                                                                                                                                                                                                                                 | CCI: PPV 94-96%                                      |
| Coronary artery bypass graft <sup>47</sup>                                                                                                          | AH              | CCI: 1I176<br>CCP: 48.11, 48.12, 48.13, 48.14, 48.15, 48.19                                                                                                                                                                                                                                                                                                                                                                                                                                                                                                                                                                                                                                                                                                                                                  | CCI: PPV 97-98%                                      |

| <b>Table S2. Databases and coding definitions for inclusion/exclusion criteria, baseline characteristics, and outcome measurements (continued).</b> |                 |                                                                                                                                                                                                                                                                                              |                                                          |
|-----------------------------------------------------------------------------------------------------------------------------------------------------|-----------------|----------------------------------------------------------------------------------------------------------------------------------------------------------------------------------------------------------------------------------------------------------------------------------------------|----------------------------------------------------------|
| <b>Baseline Co-morbidities</b>                                                                                                                      | <b>Database</b> | <b>Codes</b>                                                                                                                                                                                                                                                                                 | <b>Validation</b>                                        |
| Heart failure <sup>17,45</sup>                                                                                                                      | AH              | 1 hospitalization or 2 claims in 2 years or less:<br>ICD-9-CM: 398.91, 402.01, 402.11, 402.91, 404.01, 404.03, 404.11, 404.13, 404.91, 404.93, 425.4-425.9, 428<br>ICD-10: I09.9, I25.5, I42.0, I42.5-I42.9, I43, I50                                                                        | ICD-9-CM: Sn 72%, PPV 91%<br><br>ICD-10: Sn 69%, PPV 90% |
| Atrial fibrillation <sup>48</sup>                                                                                                                   | AH              | 1 hospitalization or 2 claims in 2 years or less:<br>ICD-9 CM: 427.3<br>ICD-10: I48.0                                                                                                                                                                                                        | ICD-9-CM: Sn 84%, PPV 89%                                |
| Stroke/Transient ischemia attack <sup>49</sup>                                                                                                      | AH              | 1 most responsible or post-admittance hospitalization or 1 claim or 1 most emergency department ACCS:<br>ICD-9-CM: 362.34, 430, 431, 433, 434, 435, 436<br>ICD-10: G45, H34.0, I60, I61, I63, I64                                                                                            | ICD-9-CM: PPV 90%<br>ICD-10: PPV 92%                     |
| Peripheral vascular disease <sup>50</sup>                                                                                                           | AH              | 1 hospitalization or 1 claim or 1 ACCS:<br>ICD-9-CM: 440.2<br>ICD-10: I70.2                                                                                                                                                                                                                  | ICD-9-CM: Sn 77%, PPV 94%                                |
| Chronic pulmonary disease (including asthma) <sup>17,45</sup>                                                                                       | AH              | 1 hospitalization or 2 claims in 2 years or less:<br>ICD-9-CM: 416.8, 416.9, 490-505, 506.4, 508.1, 508.8<br>ICD-10: I27.8, I27.9, J40-J47, J60-J67, J68.4, J70.1, J70.3                                                                                                                     | ICD-9-CM: Sn 55%, PPV 92%<br>ICD-10: Sn 53%, PPV 91%     |
| Peptic ulcer disease <sup>17,45</sup>                                                                                                               | AH              | 1 hospitalization or 2 claims in 2 years or less:<br>ICD-9-CM: 531-534<br>ICD-10: K25-K28                                                                                                                                                                                                    | ICD-9-CM: Sn 37%, PPV 84%<br>ICD-10: Sn 40%, PPV 77%     |
| Mild liver disease <sup>17,20</sup>                                                                                                                 | AH              | 1 hospitalization or 2 claims in 2 years or less:<br>ICD-9-CM: 070.22, 070.23, 070.32, 070.33, 070.44, 070.54, 070.6, 070.9, 570.x, 571.x, 573.3, 573.4, 573.8, 573.9, V42.7<br>ICD-10: B18.x, K70.0-K70.3, K70.9, K71.3-K71.5, K71.7, K73.x, K74.x, K76.0, K76.2-K76.4, K76.8, K76.9, Z94.4 | ICD-9-CM: Sn 38%, PPV 80%<br>ICD-10: Sn 41%, PPV 85%     |
| Moderate/Severe liver disease <sup>17,45</sup>                                                                                                      | AH              | 1 hospitalization or 2 claims in 2 years or less:<br>ICD-9-CM: 456.0-456.2, 572.2-572.8<br>ICD-10: I85.0, I185.9, I186.4, I198.2, K70.4, K71.1, K72.1, K72.9, K76.5, K76.6, K76.7                                                                                                            |                                                          |
| Dementia <sup>17,45</sup>                                                                                                                           | AH              | 1 hospitalization or 2 claims in 2 years or less:<br>ICD-9-CM: 290, 294.1, 331.2<br>ICD-10: F00-F03, F05.1, G30, G31.1                                                                                                                                                                       | ICD-9-CM: Sn 32%, PPV 96%<br>ICD-10: Sn 67%, PPV 93%     |



**Table S2.** Databases and coding definitions for inclusion/exclusion criteria, baseline characteristics, and outcome measurements (continued).

| Variable                                        | Database | Codes                                                                                                                                            | Validation                                              |
|-------------------------------------------------|----------|--------------------------------------------------------------------------------------------------------------------------------------------------|---------------------------------------------------------|
| Lymphoma <sup>17,45</sup>                       | AH       | 1 hospitalization or 2 claims in 2 years or less:<br>ICD-9-CM: 200-202, 203.0, 238.6<br>ICD-10: C81-C85, C88, C90.0, C90.2, C96                  | ICD-9-CM: Sn 66%, PPV 73%<br>ICD-10: Sn 63%, PPV 79%    |
| Solid tumor without metastasis <sup>17,45</sup> | AH       | 1 hospitalization or 2 claims in 2 years or less:<br>ICD-9-CM: 140-172, 174-195<br>ICD-10: C00-C26, C30-C34, C37-C41, C43, C45-C58, C60-C76, C97 | ICD-9-CM: Sn 44%, PPV 57%<br>ICD-10: Sn 46%, PPV 59%    |
| Cancer, metastatic <sup>17,45</sup>             | AH       | 1 hospitalization or 2 claims in 2 years or less:<br>ICD-9-CM: 196-199<br>ICD-10: C77-C80                                                        | ICD-9-CM: Sn 83%, PPV 89%<br>ICD-10: Sn 81%, PPV 87%    |
| HIV/AIDS <sup>45</sup>                          | AH       | 1 hospitalization or 2 claims in 2 years or less:<br>ICD-9-CM: 042-044<br>ICD-10: B20-B22, B24                                                   | ICD-9-CM: Sn 25%, PPV 100%<br>ICD-10: Sn 100%, PPV 100% |

| Variable         | Database | Codes                    |
|------------------|----------|--------------------------|
| <b>Outcomes</b>  |          |                          |
| Mortality        | AH       | Alberta Vital Statistics |
| Genitourinary    | AH       | ICD-10: N00-N99          |
| Cardiovascular   | AH       | ICD-10: I00-I99          |
| Infection        | AH       | ICD-10: A00-A99, B00-B99 |
| Cancer           | AH       | ICD-10: C00-C97, D00-D48 |
| Endocrine        | AH       | ICD-10: E00-E90          |
| Respiratory      | AH       | ICD-10: J00-J99          |
| Gastrointestinal | AH       | ICD-10: K00-K93          |

Abbreviations: ACCS, Ambulatory Care Classification System; ACR, albumin-creatinine ratio; AH, Alberta Health; AIDS, acquired immunodeficiency syndrome; AKDN, Alberta Kidney Disease Network; CCI, Canadian Classification of Health Interventions; CCP, Canadian Classification of Diagnostic, Therapeutic, and Surgical Procedures; HIV, human immunodeficiency virus; ICD-9-CM, International Classification of Diseases, Ninth Revision, Clinical Modification; ICD-10, International Statistical Classification of Diseases, Tenth Revision; NARP, Northern Alberta Renal Program; PCR, protein-creatinine ratio; PPV, positive predictive value; SARP, Southern Alberta Renal Program; SES, socio-economic status; Sn, sensitivity.

**Table S3.** Baseline characteristics of kidney transplant recipients with a failing graft and non-transplant patients with chronic kidney disease at the time of cohort entry prior to matching.<sup>a</sup>

| Characteristic                                       | Failing Graft<br>(n=562) | Chronic Kidney Disease<br>(n=32,130) | Standardized<br>Difference <sup>b</sup> |
|------------------------------------------------------|--------------------------|--------------------------------------|-----------------------------------------|
| <b>Age, years</b>                                    | 55.8 [45.0 to 64.6]      | 79.0 [69.8 to 85.6]                  | 163.5                                   |
| >65 years                                            | 136 (24)                 | 26,705 (83)                          | 146.4                                   |
| <b>Women</b>                                         | 226 (40)                 | 17,318 (54)                          | 27.7                                    |
| <b>Socio-economic status<sup>c</sup></b>             |                          |                                      |                                         |
| Lowest quintile                                      | 139 (25)                 | 9,390 (29)                           | 10.1                                    |
| Second quintile                                      | 152 (27)                 | 7,530 (23)                           | 8.3                                     |
| Middle quintile                                      | 91 (16)                  | 6,038 (19)                           | 6.8                                     |
| Fourth quintile                                      | 69 (12)                  | 4,205 (13)                           | 2.4                                     |
| Highest quintile                                     | 91 (16)                  | 3,908 (12)                           | 11.6                                    |
| Missing                                              | 20 (4)                   | 1,059 (3)                            | 1.4                                     |
| <b>Urban residence<sup>d</sup></b>                   | 485 (86)                 | 27,873 (87)                          | 1.3                                     |
| Missing                                              | 2 (0)                    | 123 (0)                              | 0.4                                     |
| <b>Distance to transplant center, km<sup>e</sup></b> | 24.7 [13.3 to 155.8]     | 25.7 [12.3 to 177.6]                 | 8.5                                     |
| <50 km                                               | 359 (64)                 | 18,440 (57)                          | 13.3                                    |
| 50.1-150 km                                          | 61 (11)                  | 3,967 (12)                           | 4.7                                     |
| 150.1-300 km                                         | 68 (12)                  | 4,887 (15)                           | 9.1                                     |
| >300 km                                              | 74 (13)                  | 4,836 (15)                           | 5.4                                     |
| <b>Northern Alberta recipient</b>                    | 364 (65)                 | N/A                                  | N/A                                     |
| <b>Year of transplant</b>                            |                          |                                      |                                         |
| 1994-2000                                            | 197 (35)                 | N/A                                  | N/A                                     |
| 2001-2007                                            | 214 (38)                 | N/A                                  | N/A                                     |
| 2008-2015                                            | 58 (10)                  | N/A                                  | N/A                                     |
| Missing                                              | 93 (17)                  | N/A                                  | N/A                                     |
| <b>Transplant to index date, years</b>               | 6.9 [3.7 to 10.6]        | N/A                                  | N/A                                     |
| <b>Index date</b>                                    |                          |                                      |                                         |
| 2002-2006                                            | 194 (35)                 | 6,620 (21)                           | 31.5                                    |
| 2007-2011                                            | 196 (35)                 | 11,399 (35)                          | 1.3                                     |
| 2012-2017                                            | 172 (31)                 | 14,111 (44)                          | 27.8                                    |
| <b>Index eGFR, mL/min/1.73 m<sup>2</sup></b>         | 26.8 [24.3 to 28.5]      | 26.5 [23.5 to 28.5]                  | 9.4                                     |
| 26-30                                                | 387 (69)                 | 20,688 (64)                          | 9.5                                     |
| 21-25                                                | 128 (23)                 | 8,413 (26)                           | 7.9                                     |
| 15-20                                                | 47 (8)                   | 3,029 (9)                            | 3.7                                     |
| <b>Index albuminuria</b>                             |                          |                                      |                                         |
| None/Mild                                            | 172 (31)                 | 8,946 (28)                           | 6.1                                     |
| Moderate                                             | 146 (26)                 | 3,473 (11)                           | 39.9                                    |
| Severe                                               | 218 (39)                 | 3,647 (11)                           | 66.7                                    |
| No measurement                                       | 26 (5)                   | 16,064 (50)                          | 118.3                                   |
| <b>Co-morbidities<sup>f</sup></b>                    |                          |                                      |                                         |
| Hypertension                                         | 360 (64)                 | 25,981 (81)                          | 38.3                                    |
| Diabetes mellitus                                    | 200 (36)                 | 14,715 (46)                          | 20.9                                    |

|                             |         |             |      |
|-----------------------------|---------|-------------|------|
| Myocardial infarction       | 39 (7)  | 2,653 (8)   | 5.0  |
| PCI/CABG                    | 25 (4)  | 1,580 (5)   | 2.2  |
| Heart failure               | 64 (11) | 11,574 (36) | 60.5 |
| Atrial fibrillation         | 35 (6)  | 6,750 (21)  | 44.1 |
| Stroke/TIA                  | 43 (8)  | 4,453 (14)  | 20.1 |
| Peripheral vascular disease | 46 (8)  | 4,790 (15)  | 21.2 |
| Chronic pulmonary disease   | 73 (13) | 8,113 (25)  | 31.6 |
| Peptic ulcer disease        | 18 (3)  | 1,352 (4)   | 5.3  |
| Liver disease               | 17 (3)  | 530 (2)     | 9.1  |
| Dementia                    | 8 (1)   | 3,697 (12)  | 41.9 |
| Lymphoma                    | 10 (2)  | 601 (2)     | 0.7  |
| Cancer (non-metastatic)     | 41 (7)  | 4,408 (14)  | 21.1 |
| Cancer (metastatic)         | 3 (1)   | 938 (3)     | 18.4 |
| HIV/AIDS                    | 2 (0)   | 24 (0)      | 6.1  |

Data is presented as number (%) or as median [interquartile range].

<sup>a</sup> The time of cohort entry is the date of the second of two eligible eGFR measurements.

<sup>b</sup> Standardized differences provide a measure of the difference between groups divided by the pooled standard deviation; >10% is interpreted as a meaningful difference between the groups.

<sup>c</sup> Income was categorized according to fifths of average neighborhood income (1=low, 5=high).

<sup>d</sup> Urban indicates a population >10,000 or a population >1,000 with population density >400/km<sup>2</sup>.

<sup>e</sup> Values >500 km were imputed as 500 km.

<sup>f</sup> Assessed by the presence of diagnostic or procedural codes in the 3 years prior to the index date, based on validated algorithms, where applicable (**Table S2**).

Abbreviations: AIDS, acquired immunodeficiency syndrome; CABG, coronary artery bypass graft; eGFR, estimated glomerular filtration rate; HIV, human immunodeficiency virus; N/A, not applicable; PCI, percutaneous coronary intervention; TIA, transient ischemic attack.
